# Supplementary material for: A multi-omics systems vaccinology resource to develop and test computational models of immunity
Source: PubMed Central journal article supplement (PMC10985234; doi:10.1016/j.crmeth.2024.100731), 2024-03-14
Supplement: mmc1.pdf [file mmc1.pdf]

**Cell Reports Methods, Volume 4**

**Supplemental information**

**A multi-omics systems vaccinology resource  
to develop and test  
computational models of immunity**

**Pramod Shinde, Ferran Soldevila, Joaquin Reyna, Minori Aoki, Mikkel Rasmussen, Lisa Willemsen, Mari Kojima, Brendan Ha, Jason A. Greenbaum, James A. Overton, Hector Guzman-Orozco, Somayeh Nili, Shelby Orfield, Jeremy P. Gygi, Ricardo da Silva Antunes, Alessandro Sette, Barry Grant, Lars Rønn Olsen, Anna Konstorum, Leying Guan, Ferhat Ay, Steven H. Kleinstein, and Bjoern Peters**

**Cell Reports Methods, Volume 4**

**Supplemental information**

**A multi-omics systems vaccinology resource  
to develop and test  
computational models of immunity**

**Pramod Shinde, Ferran Soldevila, Joaquin Reyna, Minori Aoki, Mikkel Rasmussen, Lisa Willemsen, Mari Kojima, Brendan Ha, Jason A. Greenbaum, James A. Overton, Hector Guzman-Orozco, Somayeh Nili, Shelby Orfield, Jeremy P. Gygi, Ricardo da Silva Antunes, Alessandro Sette, Barry Grant, Lars Rønn Olsen, Anna Konstorum, Leying Guan, Ferhat Ay, Steven H. Kleinstein, and Bjoern Peters**

## Supplementary Figures

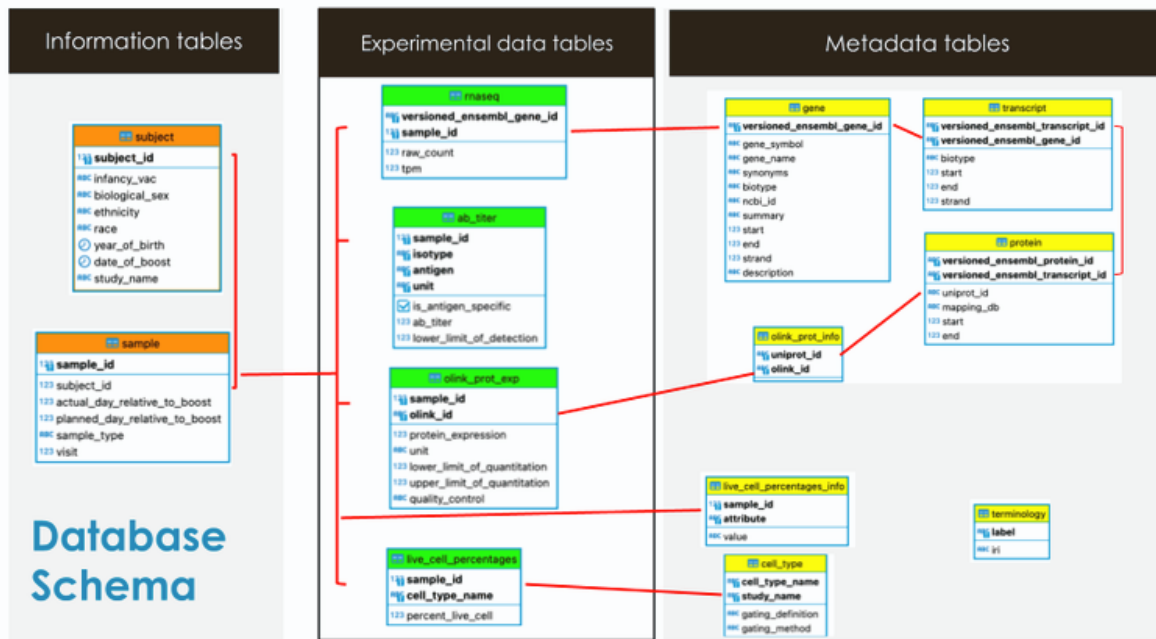

**Figure S1: CMI-PB central database schema.** The database schema is divided into information, experimental data, and metadata tables. The information tables capture subject and sample information, while the experimental data tables capture experimental data for each omics. In the *rnaseq* table, each row represents an Ensembl gene identifier (*versioned\_ensembl\_gene\_id*) along with specimen id (*specimen\_id*) and values for measured analytes (*raw\_count* and *tpm\_count*). The *ab\_titer* table contains a row for each specimen (*specimen\_id*), with the names and values for measured analytes (*isotype*, *is\_antigen\_specific*, *antigen*, *ab\_titer*, *unit*, and *lower\_limit\_of\_detection*) for the antibody titer experiment. The *olink* table contains a row for each specimen (*specimen\_id*), with the names and values for measured analytes (*olink\_id* and *protein\_expression*). Each row in the *live\_cell\_percentages* table represents a specimen (*specimen\_id*) along with the names and values for measured analytes (*cell\_type\_name* and *percent\_live\_cell*). Information on the mapping between *olink\_id* and *uniprot\_id* can be extracted using the *olink\_prot\_info* table. The metadata tables capture information about ID mapping between CMI-PB data and external databases. The *gene*, *transcript*, and *protein* tables map Ensembl gene, transcript, and protein IDs. These Ensembl IDs are then mapped to UniProt IDs. The *live\_cell\_percentages\_info* and *cell\_type* tables provide information about gating information and the experimental technique used to run cell frequency experiments.

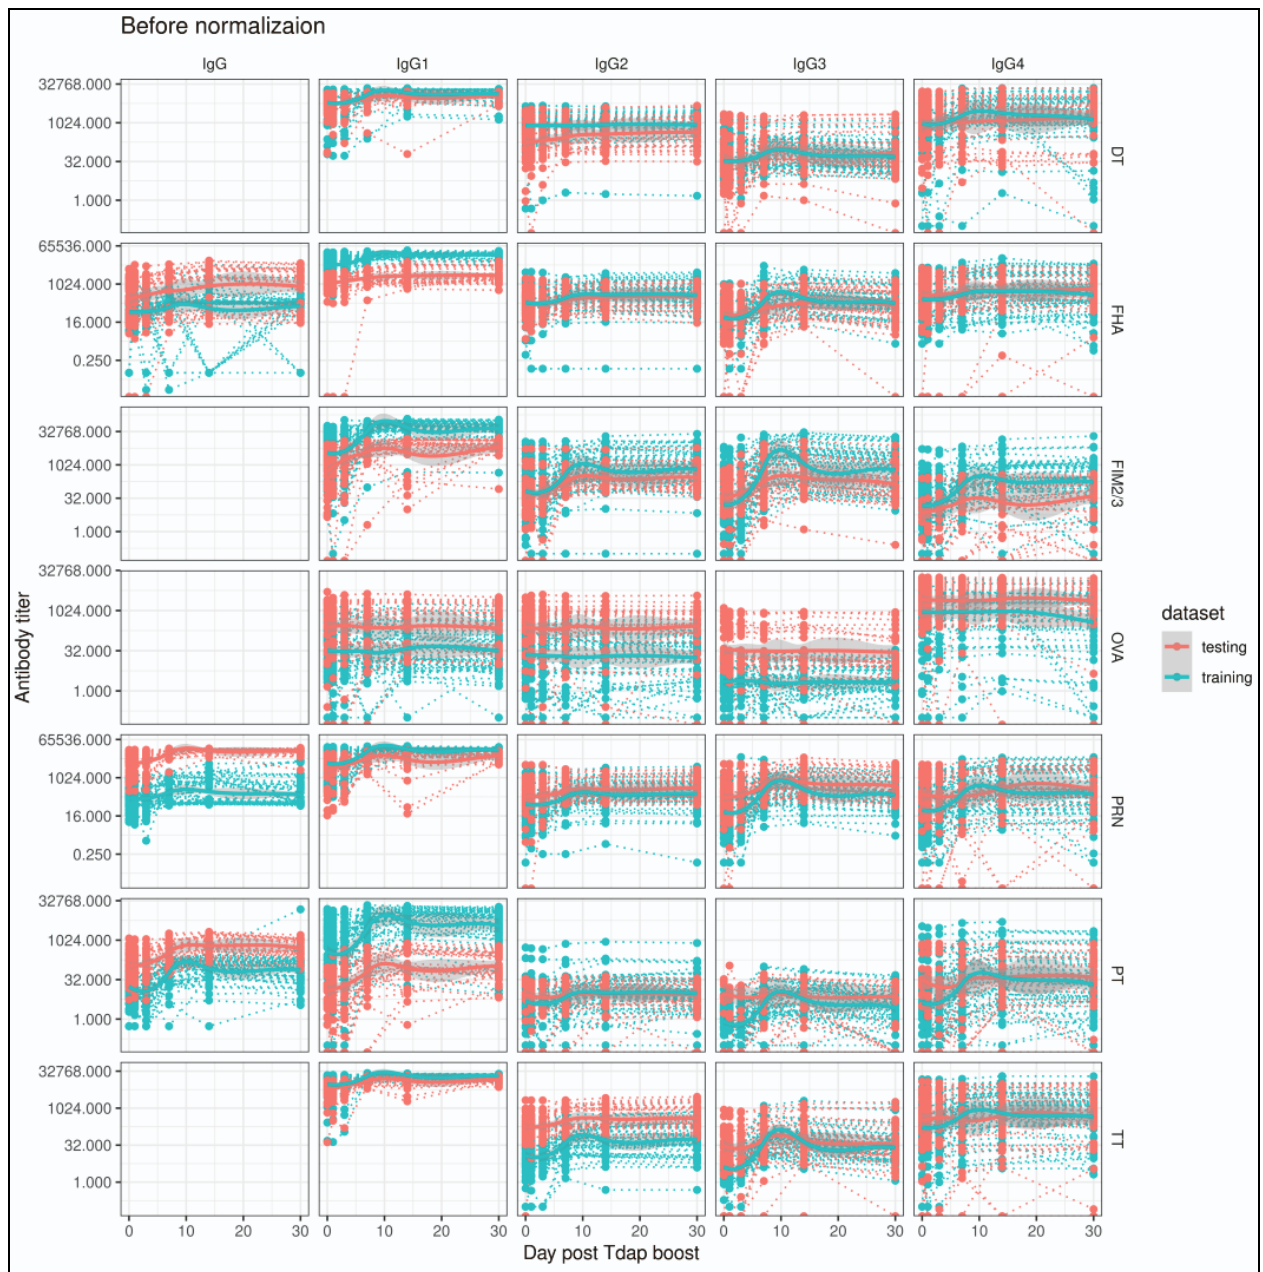

**Figure S2: Plot of antibody titer data prior to normalization.** Individual plots show the pre- and post-immune response of IgG and its subtypes against antigens. The average titer values differed between the train and test datasets.

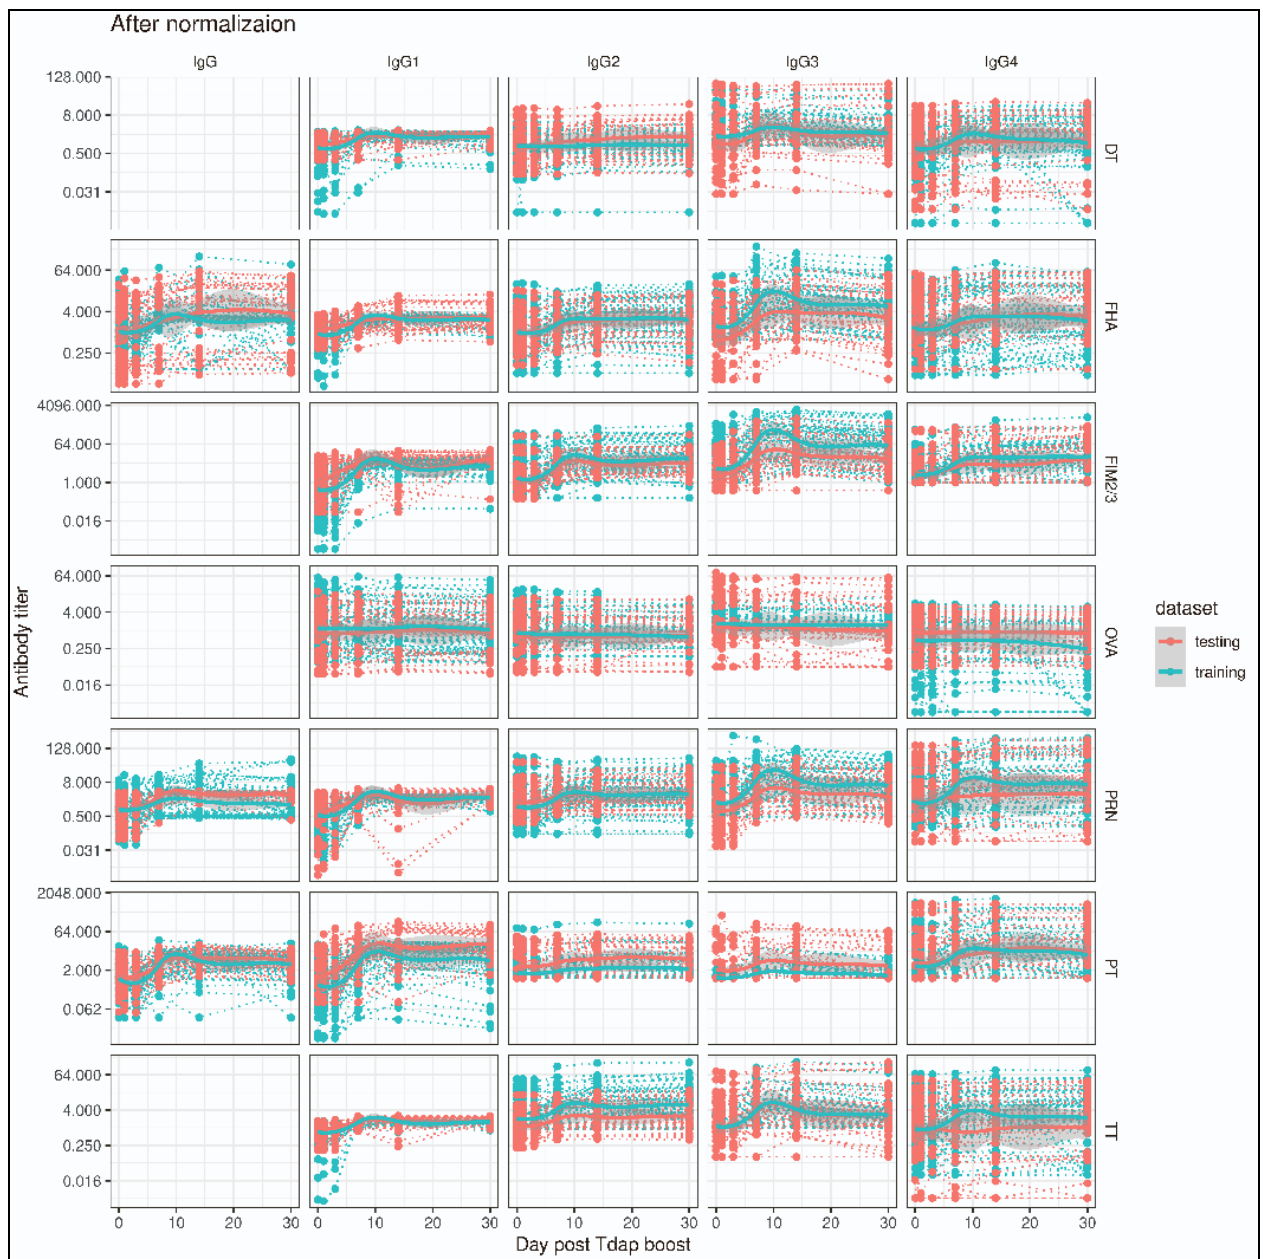

**Figure S3: Plot of antibody titer data after normalization.** We performed separate standardization of the antibody data in the train and test datasets, using the baseline median as the normalization factor. This approach allowed more direct comparisons of the normalized datasets between the train and test datasets.

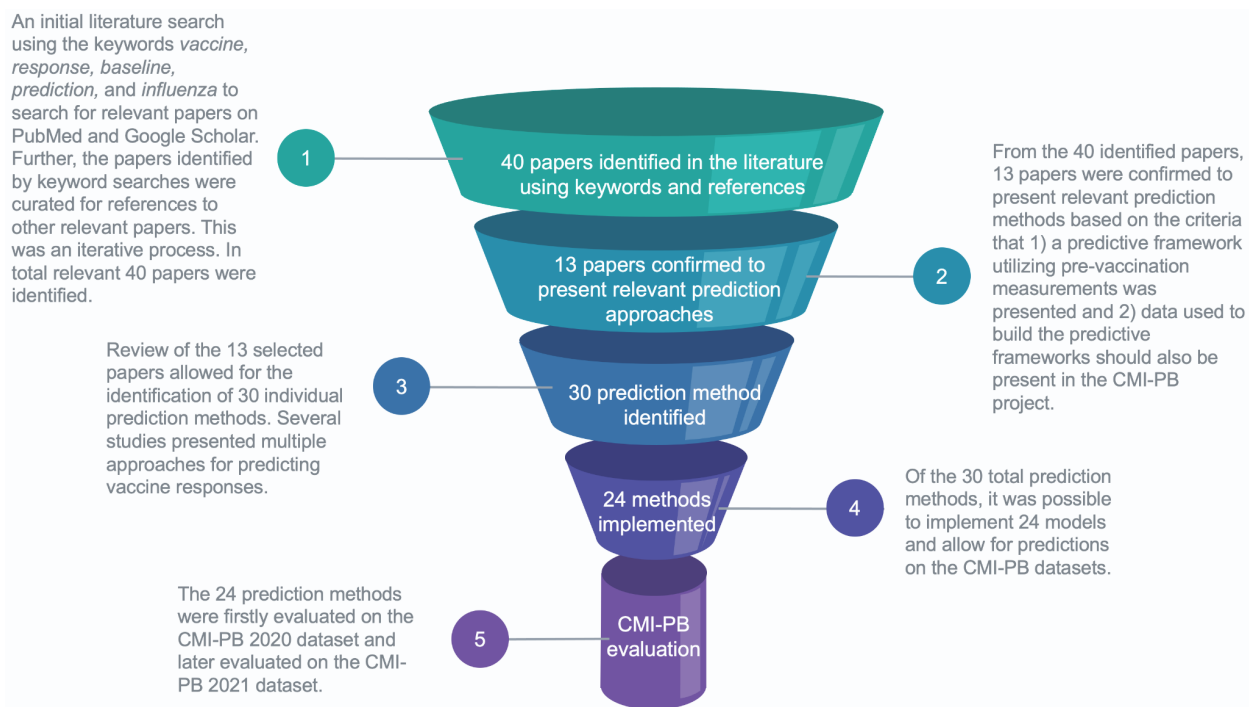

**Figure S4: Identification of published methods to predict vaccine responses.** The literature search identified previously presented methods for predicting vaccine responses. First, 40 papers were selected from the literature search using keyword searches and relevant references in other papers. From the 40 papers, 13 studies were confirmed to present relevant prediction methods based on a literature search for published vaccine response prediction methods. For several of the 13 relevant studies, multiple prediction methods were presented. In total, 24 prediction methods were implemented from 10 relevant 13 studies (mentioned in **Table S1**). The prediction methods that obtained significant results for both performance metrics in the CMI-PB train datasets were also evaluated in the CMI-PB test dataset used for the first challenge.

## Supplementary Tables

**Table S1: List of prediction tasks and their biological significance.**

|                              | Task Title        | Task statement                                                                                           | Biological and clinical significance                                         | Reference                |
|------------------------------|-------------------|----------------------------------------------------------------------------------------------------------|------------------------------------------------------------------------------|--------------------------|
| <b>Antibody level tasks</b>  |                   |                                                                                                          |                                                                              |                          |
| 1                            | IgG-PT_D14        | IgG levels against Pertussis Toxin (PT) antigen in plasma on 14 days post booster vaccination            | Vaccine-induced immunity for <i>B. pertussis</i>                             | <sup>1</sup>             |
| 2                            | IgG-FHA_D14       | IgG levels against Filamentous hemagglutinin (FHA) antigen in plasma on 14 days post booster vaccination | Vaccine-induced immunity for <i>B. pertussis</i>                             | <sup>1</sup>             |
| 3                            | IgG-Pertactin_D14 | IgG levels against Pertactin antigen in plasma on 14 days post booster vaccination                       | Vaccine-induced immunity for <i>B. pertussis</i>                             | Figure 5 in <sup>1</sup> |
| 4                            | IgG1-PT_D14       | IgG1 levels against PT antigen in plasma on 14 days post booster vaccination                             | Vaccine-induced immunity for <i>B. pertussis</i>                             | Figure 5 in <sup>1</sup> |
| 5                            | IgG1-FHA_D14      | IgG1 levels against FHA antigen in plasma on 14 days post booster vaccination                            | Vaccine-induced immunity for <i>B. pertussis</i>                             | Figure 5 in <sup>1</sup> |
| 6                            | IgG4-PT_D14       | IgG4 levels against PT antigen in plasma on 14 days post booster vaccination                             | Signature of Acellular Pertussis (aP) vs. whole-cell Pertussis (wP) response | Figure 5 in <sup>1</sup> |
| 7                            | IgG4-FHA_D14      | IgG4 levels against FHA antigen in plasma on 14 days post booster vaccination                            | Signature of aP vs. wP response                                              | Figure 5 in <sup>1</sup> |
| <b>Cell frequency tasks</b>  |                   |                                                                                                          |                                                                              |                          |
| 8                            | Plasmablast_D7    | Plasmablast cells on day 7 post-booster vaccination                                                      | Vaccine-induced immunity for <i>B. pertussis</i>                             | Figure 3 in <sup>1</sup> |
| 9                            | CD4TCM_D3         | CD4 TCM cells on 3 days post booster vaccination                                                         | Vaccine-induced immunity for <i>B. pertussis</i>                             | Figure 3 in <sup>1</sup> |
| 10                           | Monocytes_D3      | Monocytes on day 1 post-booster vaccination                                                              | Vaccine-induced immunity for <i>B. pertussis</i>                             | Figure 3 in <sup>1</sup> |
| <b>Gene expression tasks</b> |                   |                                                                                                          |                                                                              |                          |
| 11                           | CCL3_D3           | CCL3 on day 3 post booster vaccination                                                                   | Signature of aP vs. wP response                                              | Figure 7 in <sup>1</sup> |
| 12                           | IL6_D3            | IL6 on day 3 post-booster vaccination                                                                    | Signature of aP vs. wP response                                              | Figure 7 in <sup>1</sup> |

|    |               |                                             |                                 |                                    |
|----|---------------|---------------------------------------------|---------------------------------|------------------------------------|
| 13 | NFKBIA_D<br>7 | NFKBIA at day 7 post booster<br>vaccination | Signature of aP vs. wP response | Figures 6 and<br>8 in <sup>1</sup> |
| 14 | XIST_D14      | XIST on day 14 post-booster<br>vaccination  | Biological sex-specific marker  | <sup>2</sup>                       |



**Table S2: Implemented prediction methods for the first challenge.** Models 1-24: Supervised methods based on published vaccine response prediction studies. Models 25-43: unsupervised methods based on Multi-omics dimension reduction.

|   | <b>Model title</b>   | <b>Short Description</b>                                                         | <b>Method type</b>                                           | <b>Output score</b>     | <b>Experimental data</b>                                                                                                                                                                       | <b>Reference</b>                   |
|---|----------------------|----------------------------------------------------------------------------------|--------------------------------------------------------------|-------------------------|------------------------------------------------------------------------------------------------------------------------------------------------------------------------------------------------|------------------------------------|
| 1 | avey_2017_gene_sig   | 9-gene signature (RAB24, GRB2, DPP3, ACTB, MVP, DPP7, ARPC4, PLEKHB2, and ARRB1) | Classification (Diagonal Linear Discriminant Analysis: DLDA) | geneset signature score | <b>Experimental data:</b><br>PBMC and whole blood gene expression, cell subset frequencies, antibody titers<br><br><b>Pathogen:</b> Influenza virus                                            | Avey et al. 2017 <sup>1</sup>      |
| 2 | avey_2017_M54        | B-cell signaling Blood transcriptome module (BTM; Module M54)                    | Classification (DLDA)                                        | geneset signature score |                                                                                                                                                                                                |                                    |
| 3 | avey_2017_M42        | Platelet activation (III) (Module M42)                                           | Classification (DLDA)                                        | geneset signature score |                                                                                                                                                                                                |                                    |
| 4 | avey_2017_M33        | Inflammatory response Module (M33)                                               | Classification (DLDA)                                        | geneset signature score |                                                                                                                                                                                                |                                    |
| 5 | kotliarov_2020_TGSig | 10 gene signature (C2orf63, CD101, ENPP1, RETN, SMC1A, ADAM12, EPHB1, PAPSS2,    | gene signature score                                         | geneset signature score | <b>Experimental data:</b><br>PBMC and whole blood gene expression, cell subset frequencies, cell surface proteins, antibody titers<br><br><b>Pathogen:</b> Influenza virus, Yellow fever virus | Kotliarov et al. 2020 <sup>2</sup> |

|    |                                |                                                                          |                                 |                                                                                                 |                                                                                                                             |                                    |                                       |
|----|--------------------------------|--------------------------------------------------------------------------|---------------------------------|-------------------------------------------------------------------------------------------------|-----------------------------------------------------------------------------------------------------------------------------|------------------------------------|---------------------------------------|
|    |                                | LONP2,<br>C15orf57)                                                      |                                 |                                                                                                 |                                                                                                                             |                                    |                                       |
| 6  | kotliarov_2020_<br>SLE-Sig     | Systemic<br>lupus<br>erythematos<br>us<br>(SLE-Sig)<br>gene<br>signature | gene<br>signature<br>score      | geneset<br>signature score                                                                      |                                                                                                                             |                                    |                                       |
| 7  | kotliarov_2020_I<br>FN-I-DCact | IFN-I-DCac<br>t gene<br>signature                                        | gene<br>signature<br>score      | geneset<br>signature score                                                                      |                                                                                                                             |                                    |                                       |
| 8  | tsang_2014_DL<br>DA_top2       | DLDA<br>model (2<br>cell<br>populations                                  | Classification<br>(DLDA)        | Class<br>probabilities                                                                          | <b>Experimental data:</b><br>PBMC gene expression,<br>cell subset frequencies,<br>antibody titers                           | Tsan<br>g et<br>al.<br>2014<br>3   |                                       |
| 9  | tsang_2014_DL<br>DA_top5       | DLDA<br>model (5<br>cell<br>populations)                                 | Classification<br>(DLDA)        | Class<br>probabilities                                                                          |                                                                                                                             |                                    | <b>Pathogen:</b> Influenza<br>virus   |
| 10 | fourati_2015_Bio<br>Age        | BioAge                                                                   | Classification<br>(Naïve Bayes) | Class<br>probabilities                                                                          | <b>Experimental data:</b><br>Whole blood gene<br>expression, cell subset<br>frequencies, serum<br>proteins, antibody titers | Four<br>ati et<br>al.<br>2015<br>4 |                                       |
| 11 | fourati_2015_M1                | M1 of<br>BioAge                                                          | Classification<br>(Naïve Bayes) | Class<br>probabilities                                                                          |                                                                                                                             |                                    |                                       |
| 12 | fourati_2015_M1<br>+M16        | M1+M16 of<br>BioAge                                                      | Classification<br>(Naïve Bayes) | Class<br>probabilities                                                                          |                                                                                                                             |                                    | <b>Pathogen:</b> Hepatitis B<br>virus |
| 13 | fourati_2015_NB                | Naïve<br>Bayes<br>classifier<br>(15 DEGs)                                | Classification<br>(Naïve Bayes) | The ratio<br>between the<br>post-probabilit<br>ies and the log<br>odds in the<br>logistic model |                                                                                                                             |                                    |                                       |
| 14 | fourati_2015_LR                | Logistic<br>regression<br>(4 cell<br>populations)                        | Regression<br>(logistic)        | The ratio<br>between the<br>post-probabilit<br>ies and the log<br>odds in the<br>logistic model |                                                                                                                             |                                    |                                       |

|    |                               |                                             |                                |                         |                                                                                                                                                                                                                                        |                                  |
|----|-------------------------------|---------------------------------------------|--------------------------------|-------------------------|----------------------------------------------------------------------------------------------------------------------------------------------------------------------------------------------------------------------------------------|----------------------------------|
| 15 | furman_2013_age               | gene signature scores Age                   | Regression (Elastic net)       | age                     | <p><b>Experimental data:</b><br/>Whole blood gene expression, cell subset frequencies serum cytokines, antibody titers, hemagglutinin peptides</p> <p><b>Pathogen:</b> Influenza virus</p>                                             | Furman et al. 2013 <sup>5</sup>  |
| 16 | iulio_2021_HBV_transfer_sig   | HBV pre-vaccine transfer signature          | Classification (Random Forest) | geneset signature score | <p><b>Experimental data:</b><br/>PBMC and whole blood gene expression</p> <p><b>Pathogen:</b> Influenza virus, Hepatitis B virus, Mycobacterium tuberculosis</p>                                                                       | Iulio et al. 2021 <sup>6</sup>   |
| 17 | iulio_2021_Inf_M_transfer_sig | Influenza M pre-vaccine transfer signature  | Classification (Random Forest) | geneset signature score |                                                                                                                                                                                                                                        |                                  |
| 18 | iulio_2021_Inf_F_transfer_sig | Influenza F pre-vaccine transfer signature  | Classification (Random Forest) | geneset signature score |                                                                                                                                                                                                                                        |                                  |
| 19 | iulio_2021_TB_transfer_sig    | TB pre-vaccine transfer signature           | Classification (Random Forest) | geneset signature score |                                                                                                                                                                                                                                        |                                  |
| 20 | fourati_2021_RF               | Random Forest model (top 500 varying genes) | Classification (Random Forest) | Class probabilities     | <p><b>Experimental data:</b><br/>PBMC and whole blood gene expression, cell surface proteins, cell subset frequencies, antibody titers</p> <p><b>Pathogen:</b> Influenza, smallpox, Yellow fever virus, Pneumococcal meningococcal</p> | Fourati et al. 2021 <sup>7</sup> |
| 21 | bartholomeus_2018_gene_sig    | 23 differentially expressed genes           | Classification (Random Forest) | Class probabilities     | <p><b>Experimental data:</b><br/>Whole blood gene expression, absolute numbers of white blood cells, red blood cells,</p>                                                                                                              | Bartholomeus et al.              |

|    |                      |                                              |                              |                         |                                                                                                                                         |                                  |
|----|----------------------|----------------------------------------------|------------------------------|-------------------------|-----------------------------------------------------------------------------------------------------------------------------------------|----------------------------------|
| 22 | bartholomeus_2018_NB | Naïve Bayes classifier (first 5 PCs)         | Classification (Naïve Bayes) | Class probabilities     | and platelets, antibody titers<br><br><b>Pathogen:</b> Hepatitis B virus                                                                | 2018 <sup>8</sup>                |
| 23 | qui_2018_gene_sig    | 55 up- and 15 down-regulated genes           | gene signature score         | geneset signature score | <b>Experimental data:</b> PBMC gene expression, antibody titers<br><br><b>Pathogen:</b> Hepatitis B virus                               | Qui et al. 2018 <sup>9</sup>     |
| 24 | franco_2013_gene_sig | 49 genes correlated with antibody response   | gene signature score         | geneset signature score | <b>Experimental data:</b> Whole blood gene expression, whole-genome genotyping, antibody titers<br><br><b>Pathogen:</b> Influenza virus | Franco et al. 2013 <sup>10</sup> |
| 25 | jive.elastic_net_cv  | Elastic net regression with cross-validation | Regression (Elastic net)     |                         | <b>Experimental data:</b> PBMC gene expression, cell frequencies, antibody titers                                                       | Lock et al. 2013 <sup>11</sup>   |
| 26 | jive.elastic_net     | Elastic net regression                       | Regression (Elastic net)     |                         |                                                                                                                                         |                                  |
| 27 | jive.lasso_cv        | lasso regression with cross-validation       | Regression (lasso)           |                         |                                                                                                                                         |                                  |
| 28 | jive.lasso           | lasso regression                             | Regression (lasso)           |                         |                                                                                                                                         |                                  |
| 29 | jive.lr              | Linear regression                            | Regression (linear)          |                         |                                                                                                                                         |                                  |
| 30 | baseline             |                                              | Regression (lasso)           |                         | Baseline tasks, clinical and demographic features                                                                                       |                                  |
| 31 | MCIAbasic            |                                              | Regression (lasso)           |                         | <b>Experimental data:</b> transcriptome, cell                                                                                           |                                  |

|    |         |  |                    |  |                                                                       |  |
|----|---------|--|--------------------|--|-----------------------------------------------------------------------|--|
|    |         |  |                    |  | frequencies, antibody levels, cytokines                               |  |
| 32 | MCIPlus |  | Regression (lasso) |  | Factors from the MCIAbasic model and features from the baseline model |  |

**Table S3. Summary of questions asked by contestants on the Solutions center.** In total, we received 23 questions that we divided into three categories.

| Category of Questions            | Number of Questions | Summary                                                                                                                                                                                                                                                                                                                                                                                                                                                                                                                                                                                                                                                                                                                                                                                                                                                                                              |
|----------------------------------|---------------------|------------------------------------------------------------------------------------------------------------------------------------------------------------------------------------------------------------------------------------------------------------------------------------------------------------------------------------------------------------------------------------------------------------------------------------------------------------------------------------------------------------------------------------------------------------------------------------------------------------------------------------------------------------------------------------------------------------------------------------------------------------------------------------------------------------------------------------------------------------------------------------------------------|
| Data access and format           | 14                  | Most questions were raised to know details about how contestants can access more data on the analytes' names, how analytes were measured, and the description of the measured unit. Several questions raised issues, like how QC was performed by Olink assay and the role of limit detections on filtering analyte values. Contestants found multiple proteins with duplicate expressions (i.e., IL5). All these questions have been assessed and resolved by the CMI-PB team. Several questions are raised to inquire about difficulties in accessing data API. The CMI-PB team provided direct file download options to contestants. The major concern discussed was antibody titer data was not predictive. Ab titer data normalization was performed using the median at day 0 as a normalization factor for CMI-PB data. Normalization was separately performed on training and test datasets. |
| Data processing                  | 6                   | Questions were raised on how to deal with missing values in the data. Missing values arose if analyte measurements were below the limit of the detection threshold and samples needed to be included for subjects to make a complete multi-omics dataset. Out of two that worked with machine learning approaches, one decided to work only with available analyte measurements, and another team worked on data imputation after the decision in a regular meeting.                                                                                                                                                                                                                                                                                                                                                                                                                                 |
| Miscellaneous (Contest, website) | 3                   | Other questions were specifically asked about how to access challenge tasks, and contestants mentioned that they could not access information about data files on the website.                                                                                                                                                                                                                                                                                                                                                                                                                                                                                                                                                                                                                                                                                                                       |

**Table S4. Cohort demographic information**

| <b>Subject id</b> | <b>Infancy vaccination</b> | <b>Biological sex</b> | <b>Ethnicity</b>       | <b>Race</b>                               | <b>Year of birth</b> | <b>Date of boost</b> |
|-------------------|----------------------------|-----------------------|------------------------|-------------------------------------------|----------------------|----------------------|
| 61                | wP                         | Female                | Not Hispanic or Latino | Unknown or Not Reported                   | 1/1/1987             | 4/8/2019             |
| 62                | wP                         | Female                | Not Hispanic or Latino | Asian                                     | 1/1/1993             | 11/26/2018           |
| 63                | wP                         | Female                | Not Hispanic or Latino | White                                     | 1/1/1995             | 11/26/2018           |
| 64                | wP                         | Male                  | Not Hispanic or Latino | Asian                                     | 1/1/1993             | 11/26/2018           |
| 65                | wP                         | Male                  | Not Hispanic or Latino | White                                     | 1/1/1990             | 12/3/2018            |
| 66                | wP                         | Female                | Not Hispanic or Latino | Black or African American                 | 1/1/1976             | 12/3/2018            |
| 67                | wP                         | Female                | Hispanic or Latino     | White                                     | 1/1/1972             | 1/28/2019            |
| 68                | wP                         | Male                  | Hispanic or Latino     | White                                     | 1/1/1972             | 1/28/2019            |
| 69                | wP                         | Female                | Hispanic or Latino     | White                                     | 1/1/1990             | 1/28/2019            |
| 70                | aP                         | Male                  | Not Hispanic or Latino | American Indian/Alaska Native             | 1/1/1998             | 1/28/2019            |
| 71                | aP                         | Female                | Not Hispanic or Latino | White                                     | 1/1/1998             | 1/28/2019            |
| 72                | wP                         | Female                | Not Hispanic or Latino | White                                     | 1/1/1991             | 2/25/2019            |
| 73                | wP                         | Female                | Not Hispanic or Latino | White                                     | 1/1/1995             | 2/25/2019            |
| 74                | wP                         | Female                | Not Hispanic or Latino | White                                     | 1/1/1995             | 2/25/2019            |
| 75                | aP                         | Female                | Not Hispanic or Latino | Native Hawaiian or Other Pacific Islander | 1/1/1998             | 2/25/2019            |
| 76                | aP                         | Female                | Not Hispanic or Latino | Asian                                     | 1/1/1998             | 2/25/2019            |
| 77                | wP                         | Male                  | Not Hispanic or Latino | White                                     | 1/1/1988             | 3/18/2019            |
| 78                | wP                         | Female                | Not Hispanic or Latino | White                                     | 1/1/1993             | 3/18/2019            |
| 79                | wP                         | Male                  | Not Hispanic or Latino | White                                     | 1/1/1987             | 3/18/2019            |
| 80                | wP                         | Female                | Not Hispanic or        | Asian                                     | 1/1/1992             | 3/18/2019            |

|    |    |        |                        |                         |          |           |
|----|----|--------|------------------------|-------------------------|----------|-----------|
|    |    |        | Latino                 |                         |          |           |
| 81 | wP | Male   | Not Hispanic or Latino | White                   | 1/1/1993 | 3/18/2019 |
| 82 | aP | Female | Not Hispanic or Latino | More Than One Race      | 1/1/1998 | 3/18/2019 |
| 83 | aP | Female | Not Hispanic or Latino | White                   | 1/1/1999 | 4/8/2019  |
| 84 | aP | Female | Not Hispanic or Latino | More Than One Race      | 1/1/1997 | 4/8/2019  |
| 85 | aP | Female | Hispanic or Latino     | White                   | 1/1/2000 | 4/29/2019 |
| 86 | aP | Female | Not Hispanic or Latino | Asian                   | 1/1/1998 | 4/29/2019 |
| 87 | aP | Male   | Not Hispanic or Latino | Asian                   | 1/1/2000 | 4/29/2019 |
| 88 | aP | Male   | Not Hispanic or Latino | Asian                   | 1/1/1900 | 4/29/2019 |
| 89 | aP | Female | Not Hispanic or Latino | Asian                   | 1/1/1997 | 6/3/2019  |
| 90 | aP | Female | Not Hispanic or Latino | Asian                   | 1/1/1999 | 6/3/2019  |
| 91 | aP | Male   | Unknown                | Unknown or Not Reported | 1/1/1998 | 6/3/2019  |
| 92 | aP | Female | Hispanic or Latino     | White                   | 1/1/2000 | 6/24/2019 |
| 93 | aP | Female | Not Hispanic or Latino | More Than One Race      | 1/1/1996 | 6/24/2019 |
| 94 | aP | Male   | Not Hispanic or Latino | Unknown or Not Reported | 1/1/1999 | 6/24/2019 |
| 95 | aP | Female | Hispanic or Latino     | Unknown or Not Reported | 1/1/1998 | 6/24/2019 |
| 96 | aP | Male   | Hispanic or Latino     | Unknown or Not Reported | 1/1/2000 | 6/24/2019 |



## References:

1. HIPC-CHI Signatures Project Team and HIPC-I Consortium (2017). Multicohort analysis reveals baseline transcriptional predictors of influenza vaccination responses. *Sci. Immunol.* 2, eaal4656. 10.1126/sciimmunol.aal4656.
2. Kotliarov, Y., Sparks, R., Martins, A.J., Mulè, M.P., Lu, Y., Goswami, M., Kardava, L., Banchereau, R., Pascual, V., Biancotto, A., et al. (2020). Broad immune activation underlies shared set point signatures for vaccine responsiveness in healthy individuals and disease activity in patients with lupus. *Nat Med* 26, 618–629. 10.1038/s41591-020-0769-8.
3. Tsang, J.S., Schwartzberg, P.L., Kotliarov, Y., Biancotto, A., Xie, Z., Germain, R.N., Wang, E., Olnes, M.J., Narayanan, M., Golding, H., et al. (2014). Global analyses of human immune variation reveal baseline predictors of postvaccination responses. *Cell* 157, 499–513. 10.1016/j.cell.2014.03.031.
4. Fourati, S., Cristescu, R., Loboda, A., Talla, A., Filali, A., Railkar, R., Schaeffer, A.K., Favre, D., Gagnon, D., Peretz, Y., et al. (2016). Pre-vaccination inflammation and B-cell signalling predict age-related hyporesponse to hepatitis B vaccination. *Nat Commun* 7, 10369. 10.1038/ncomms10369.
5. Furman, D., Jovic, V., Kidd, B., Shen-Orr, S., Price, J., Jarrell, J., Tse, T., Huang, H., Lund, P., Maecker, H.T., et al. (2013). Apoptosis and other immune biomarkers predict influenza vaccine responsiveness. *Mol Syst Biol* 9, 659. 10.1038/msb.2013.15.
6. di Iulio, J., Bartha, I., Spreafico, R., Virgin, H.W., and Telenti, A. (2021). Transfer transcriptomic signatures for infectious diseases. *Proc Natl Acad Sci U S A* 118. 10.1073/pnas.2022486118.
7. Fourati, S., Tomalin, L.E., Mulè, M.P., Chawla, D.G., Gerritsen, B., Rychkov, D., Henrich, E., Miller, H.E.R., Hagan, T., Diray-Arce, J., et al. (2022). Pan-vaccine analysis reveals innate immune endotypes predictive of antibody responses to vaccination. *Nat Immunol* 23, 1777–1787. 10.1038/s41590-022-01329-5.
8. Bartholomeus, E., De Neuter, N., Meysman, P., Suls, A., Keersmaekers, N., Elias, G., Jansens, H., Hens, N., Smits, E., Van Tendeloo, V., et al. (2018). Transcriptome profiling in blood before and after hepatitis B vaccination shows significant differences in gene expression between responders and non-responders. *Vaccine* 36, 6282–6289. 10.1016/j.vaccine.2018.09.001.
9. Qiu, S., He, P., Fang, X., Tong, H., Lv, J., Liu, J., Zhang, L., Zhai, X., Wang, L., Hu, Z., et al. (2018). Significant transcriptome and cytokine changes in hepatitis B vaccine non-responders revealed by genome-wide comparative analysis. *Hum Vaccin Immunother* 14, 1763–1772. 10.1080/21645515.2018.1450122.
10. Franco, L.M., Bucayas, K.L., Wells, J.M., Niño, D., Wang, X., Zapata, G.E., Arden, N., Renwick, A., Yu, P., Quarles, J.M., et al. (2013). Integrative genomic analysis of the human immune response to influenza vaccination. *Elife* 2, e00299. 10.7554/eLife.00299.
11. Lock, E.F., Hoadley, K.A., Marron, J.S., and Nobel, A.B. (2013). Joint and individual variation explained (jive) for integrated analysis of multiple data types. *Ann Appl Stat* 7, 523–542. 10.1214/12-AOAS597.
